# Supplementary material for: Surgeons’ pursuit of professional achievement and work-life balance in a demanding working environment: An exploratory qualitative study in Japan
Source: Research Square preprint supplement (doi:10.21203/rs.3.rs-7663618/v1), 2025-10-09
Supplement: Supplementary file 1 [file 5acf2a59e8eb776ab8bf0160.docx]

Supplementary file 1. Interview Guide (English translation)

Study 1: Primary goals and perceptions about daily tasks

1. **Demographic information**
   Participants were asked to provide the following information:

- Age group (30s, 40s, 50s)
- Gender (Male/Female)
- Specialty (e.g., gastrointestinal surgery, respiratory surgery, orthopedic surgery, cardiovascular surgery)
- Marital status (married/unmarried)

**b. Interview questions**

1. What kind of surgeon would you like to become in the future?

Example options provided:

- 1. high-skilled surgeon
  2. high-career position like manager
  3. academic career such as professor
  4. maintaining a well-balanced of household environment
  5. pursuing other business opportunities.

1. How do you feel about the diverse daily tasks that surgeons are required to perform?
2. Do you perceive any unfairness regarding workload distribution among surgeons?
3. In your opinion, what is necessary to establish a well-functioning team despite diverse roles and workloads?
4. Are you willing to allow your comments to be presented anonymously in academic presentations, online platforms, and publications?

Study 2: Issues affecting surgeons’ family life

**a. Demographic information**
Participants were asked to provide the following information:

- Age group (30s, 40s, 50s)
- Gender (Male/Female)
- Specialty (e.g., gastrointestinal surgery, orthopedic surgery, breast surgery, cardiovascular surgery, respiratory surgery)

**b. Interview questions**

1. What kind of work-related difficulties or unexpected demands do you encounter in your daily practice? For example, prolonged surgeries, long operating hours, overnight hospital duties, or unscheduled emergency calls during nights or weekends (in Japan, such calls are not always based on a formal on-call system but often arise simply from being the primary physician in charge).
2. What strategies have you employed to manage these difficulties?
3. Do you agree to allow your comments to be presented anonymously in academic presentations, online platforms, and publications?

**Notes**

This interview guide was originally developed for this study. All interviews were conducted in Japanese.
